# Supplementary material
Source: publisher figshare collection journal article supplement (https://karger.figshare.com/ndownloader/files/28971918)
Supplement: Supplementary file 1 [file 28971918]

**Sarcopenic Obesity in Chronic Kidney Disease: Challenges in Diagnosis using Different Diagnostic Criteria**

Natália Tomborelli Bellafronte a, Amanda de Queirós Mattoso Onob, Paula Garcia Chiarelloc

aPost-graduate Program in Health Sciences; bNutrition and Metabolism Undergraduate Course; cDepartment of Health Sciences, Ribeirão Preto Faculty of Medicine, University of São Paulo, Ribeirão Preto City, São Paulo State, Brazil

**Address all correspondence to:**

Natália Tomborelli Bellafronte

Post-graduate Program in Health Sciences,

Ribeirão Preto Faculty of Medicine, University of São Paulo

Bandeirantes Avenue, 3900

Ribeirão Preto City, São Paulo State, 14049-190,

Brazil

E-mail: [natalia.bellafronte@usp.br](mailto:natalia.bellafronte@usp.br)

**Short Title:** Sarcopenic Obesity in Chronic Kidney Disease

**Keywords:** Body composition **·** Chronic kidney disease **·** Muscle mass **·** Muscle strength **·** Obesity **·** Sarcopenia.

**Figure S1:** ALM: appendicular lean mass; ALMI: appendicular lean mass index; BMI: body mass index; FMI: fat mass index; HGS: hand grip strength; WC, waist circumference; %FM, percentage of fat mass. Percentage of total sample calculated with n=266; percentage of female sample calculated with n=129; percentage of male sample calculated with n=137. See table 1 for codes and diagnostic reference.

**Figure S2:** ALM: appendicular lean mass; ALMI: appendicular lean mass index; ALMIfmi: appendicular lean mass index adjusted for fat mat index; BMI: body mass index; HGS: hand grip strength; FMI: fat mass index; WC: waist circumference; %FM, percentage of fat mass. Percentage of total sample calculated with n=266; percentage of female sample calculated with n=129; percentage of male sample calculated with n=137. See table 1 for codes and diagnostic reference.
